# Supplementary material for: HBcAb Positivity Is a Risk Factor for an Increased Detectability of HIV RNA after Switching to a Two-Drug Regimen Lamivudine-Based (2DR-3TC-Based) Treatment: Analysis of a Multicenter Italian Cohort
Source: PubMed Central journal article supplement (PMC7919011; doi:10.3390/microorganisms9020396), 2021-02-15
Supplement: microorganisms-09-00396-s001.pdf [file microorganisms-09-00396-s001.pdf]

**Supplementary table. Comparison of HIV viral load values at the different time points between the PLWH HBcAb-positive and HBcAb-negative groups of patients switched to 3TC+dolutegravir.**

|                                                         | HBcAb-positive<br>(n=34) | HBcAb-negative<br>(n=78) | p-value       |
|---------------------------------------------------------|--------------------------|--------------------------|---------------|
| Sex ratio M/F, %F                                       | 28/6 (17.6%)             | 56/17 (23.3%)            | 0.51          |
| Age, years                                              | 49 (35-57)               | 55 (52-59)               | <b>0.0079</b> |
| Calendar year of HIV diagnosis, median (range)          | 2009 (2007-2015)         | 2004 (1997-2012)         | <b>0.0046</b> |
| Nadir CD4+ cell/mm <sup>3</sup> , median (range)        | 263 (166-413)            | 342 (226-466)            | 0.11          |
| History of therapeutic failure, n (%)                   | 9 (26.3%)                | 7 (9.6%)                 | 0.12          |
| Pre-2DR switch triple ART composition, n (%):           |                          |                          | <b>0.002</b>  |
| 2NRTI+PI                                                | 12 (35.3%)               | 5 (6.8%)                 |               |
| 2NRTI+NNRTI                                             | 9 (26.5%)                | 23 (31.5%)               |               |
| 2NRTI+INI                                               | 12 (35.3%)               | 42 (57.5%)               |               |
| Other                                                   | 1 (2.9%)                 | 3 (4.1%)                 |               |
| CD4+ cell/mm <sup>3</sup> at 2DR switch, median (range) | 781 (565-982)            | 756 (558-952)            | <b>0.029</b>  |
| HIV RNA 24 months pre-2DR switch, n (%):                |                          |                          | 0.89          |
| pts <20 copies/ml                                       | 26 (76.5%)               | 55 (75.3%)               |               |
| pts <20 copies/ml target detected                       | 8 (23.5%)                | 18 (24.6%)               |               |
| HIV RNA 12 months pre-2DR switch, n (%):                |                          |                          | 0.18          |
| pts <20 copies/ml                                       | 23 (67.6%)               | 58 (79.4%)               |               |
| pts <20 copies/ml target detected                       | 11 (32.3%)               | 15 (20.5%)               |               |
| HIV RNA at 2DR switch, n (%):                           |                          |                          | 0.63          |
| pts <20 copies/ml                                       | 26 (76.5%)               | 55 (75.3%)               |               |
| pts <20 copies/ml target detected                       | 7 (20.6%)                | 17 (23.3%)               |               |
| Not available                                           | 1 (3%)                   | 1 (1.4%)                 |               |
| HIV RNA 6 months post-2DR switch, n (%):                |                          |                          | 0.12          |
| pts <20 copies/ml                                       | 24 (70.6%)               | 61 (83.6%)               |               |
| pts <20 copies/ml target detected                       | 10 (29.4%)               | 12 (16.4%)               |               |
| HIV RNA 12 months post-2DR switch, n (%)*:              |                          |                          | <b>0.02</b>   |
| pts <20 copies/ml                                       | 10 (32.3%)               | 37 (63.8%)               |               |
| pts <20 copies/ml target detected                       | 11 (35.4%)               | 14 (24.1%)               |               |
| pts detectable >20 copies/ml                            | 10 (32.3%)               | 7 (12.1%)                |               |
| HIV RNA 24 months post-2DR switch, n (%)**:             |                          |                          | <b>0.006</b>  |
| pts <20 copies/ml                                       | 5 (20.8%)                | 26 (54.2%)               |               |
| pts <20 copies/ml target detected                       | 9 (37.5%)                | 16 (33.3%)               |               |
| pts detectable >20 copies/ml                            | 10 (41.7%)               | 6 (12.5%)                |               |

Abbreviations: 3TC: lamivudine; NRTI: nucleoside reverse transcriptase inhibitors; NNRTI: nonnucleoside reverse transcriptase inhibitors; PI: protease inhibitors; DTG: dolutegravir; 2DR: two-drug antiretroviral therapy; pts: patients; HBcAb-positive: patients with antibodies against hepatitis B c antigen \* Data available for 81 pts; \*\* Data available for 72 pts
